# Supplementary material for: Local atomic structure of thin and ultrathin films via rapid high-energy X-ray total scattering at grazing incidence
Source: PubMed Central journal article supplement (PMC6400183; doi:10.1107/s2052252519000514), 2019-02-21
Supplement: m-06-00290-sup1.pdf [file m-06-00290-sup1.pdf]

# IUCrJ

**Volume 6 (2019)**

**Supporting information for article:**

**Local atomic structure of thin and ultrathin films *via* rapid high-energy X-ray total scattering at grazing incidence**

**Ann-Christin Dippel, Martin Roelsgaard, Ulrich Böettger, Theodor Schneller, Olof Gutowski and Uta Ruett**

Supplementary information

## Local atomic structure of thin and ultrathin films *via* rapid high-energy X-ray total scattering in grazing incidence

Ann-Christin Dippel<sup>a</sup>, Martin Roelsgaard<sup>b</sup>, Ulrich Böttger<sup>c</sup>, Theodor Schneller<sup>c</sup>, Olof Gutowski<sup>a</sup>, Uta Ruett<sup>d</sup>

<sup>a</sup> *Deutsches Elektronen-Synchrotron DESY, Hamburg, Germany*

<sup>b</sup> *Center for Materials Crystallography, Department of Chemistry, Aarhus University, Denmark*

<sup>c</sup> *Institute for Materials in Electrical Engineering, RWTH Aachen University, Germany*

<sup>d</sup> *Advanced Photon Source, Argonne National Laboratory, 9700 S. Cass Avenue, Argonne, IL 60439, USA*

### Table of contents

|           |                                                                                                                                                |
|-----------|------------------------------------------------------------------------------------------------------------------------------------------------|
| Figure S1 | Penetration depth in dependence of photon energy                                                                                               |
| Figure S2 | Background subtraction in reciprocal space for spin-coated HfO <sub>2</sub> thin films of different film thickness on fused silicon substrates |
| Figure S3 | Illustration and calculated values of the footprint and its projected width on the area detector                                               |
| Figure S4 | Short-range order scale of ZrO <sub>2</sub> thin films and reference PDFs (magnified low- <i>r</i> region of Figure 4a)                        |
| Table S1  | $Q_{\max}$ values for the PDFs shown in the main text                                                                                          |

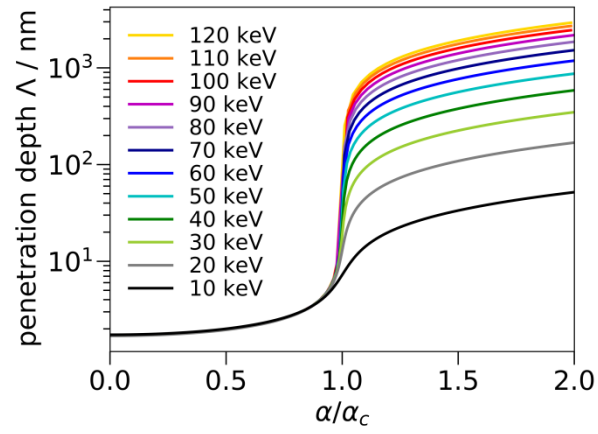

**Figure S1:** Penetration depth of photons of various energies calculated according to R. Feidenhans'l, (1989), Surf. Sci. Rep. 10, 105–188, exemplarily for Cu as a material without absorption edges within the illustrated energy range.

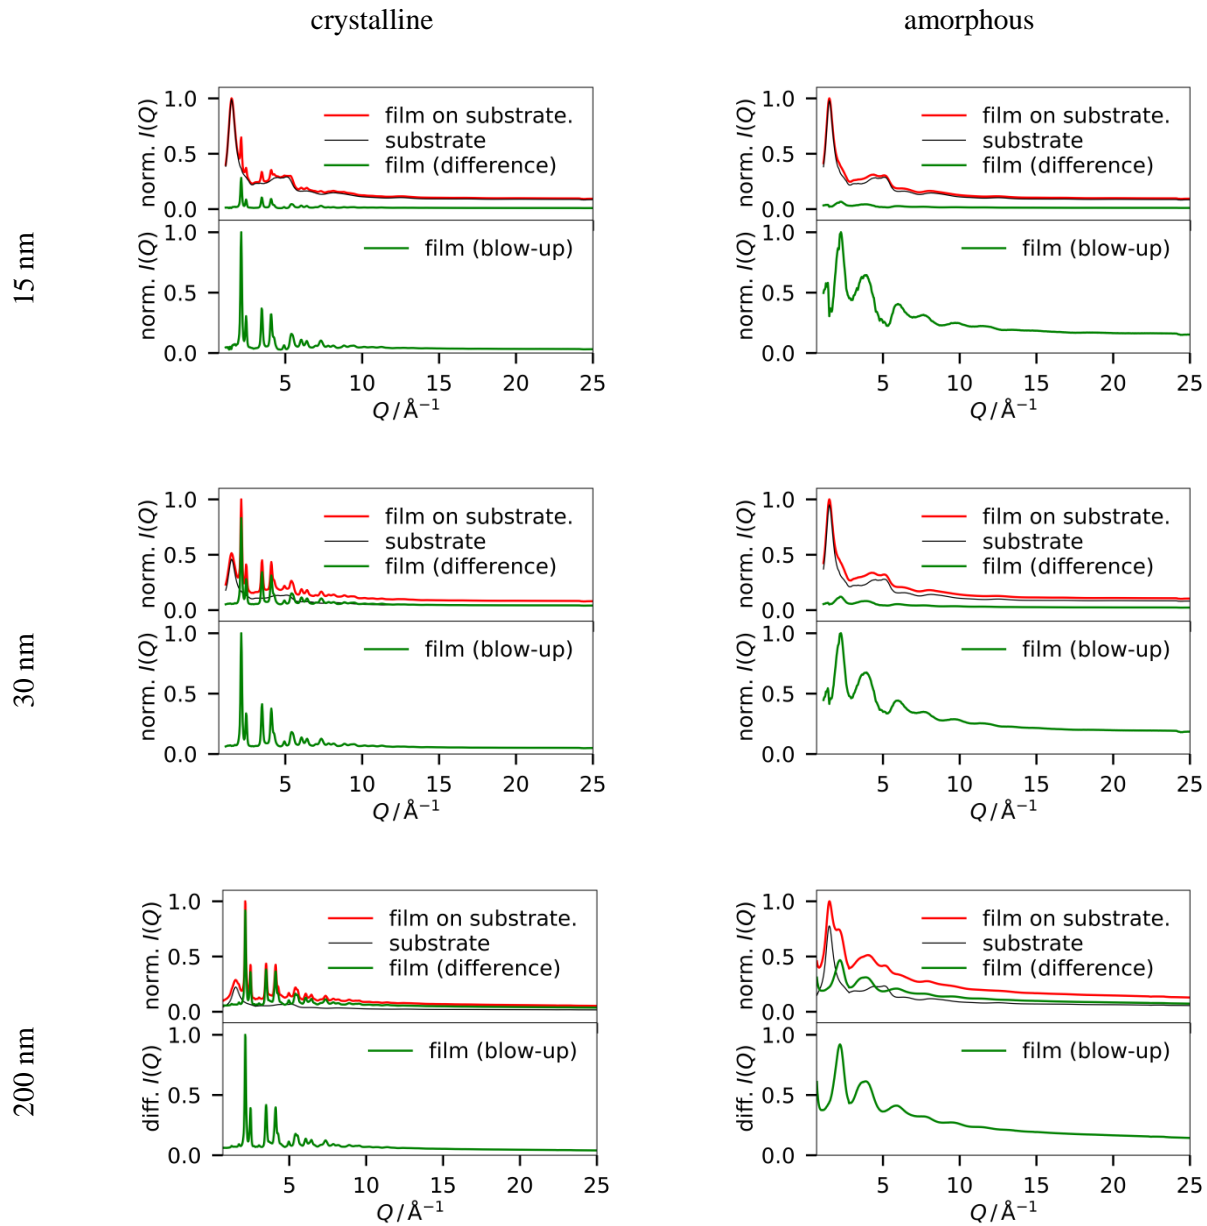

**Figure S2:** Integrated XRD patterns for HfO<sub>2</sub> layers on fused silica at different thicknesses, prepared by various repetitions of the coating process, and heat treated at 800 °C (crystalline) and 295 °C (amorphous). The plots show the integrated data of the samples and the scaled background patterns from the fused silica substrate, and the magnified subtracted signals for each case.

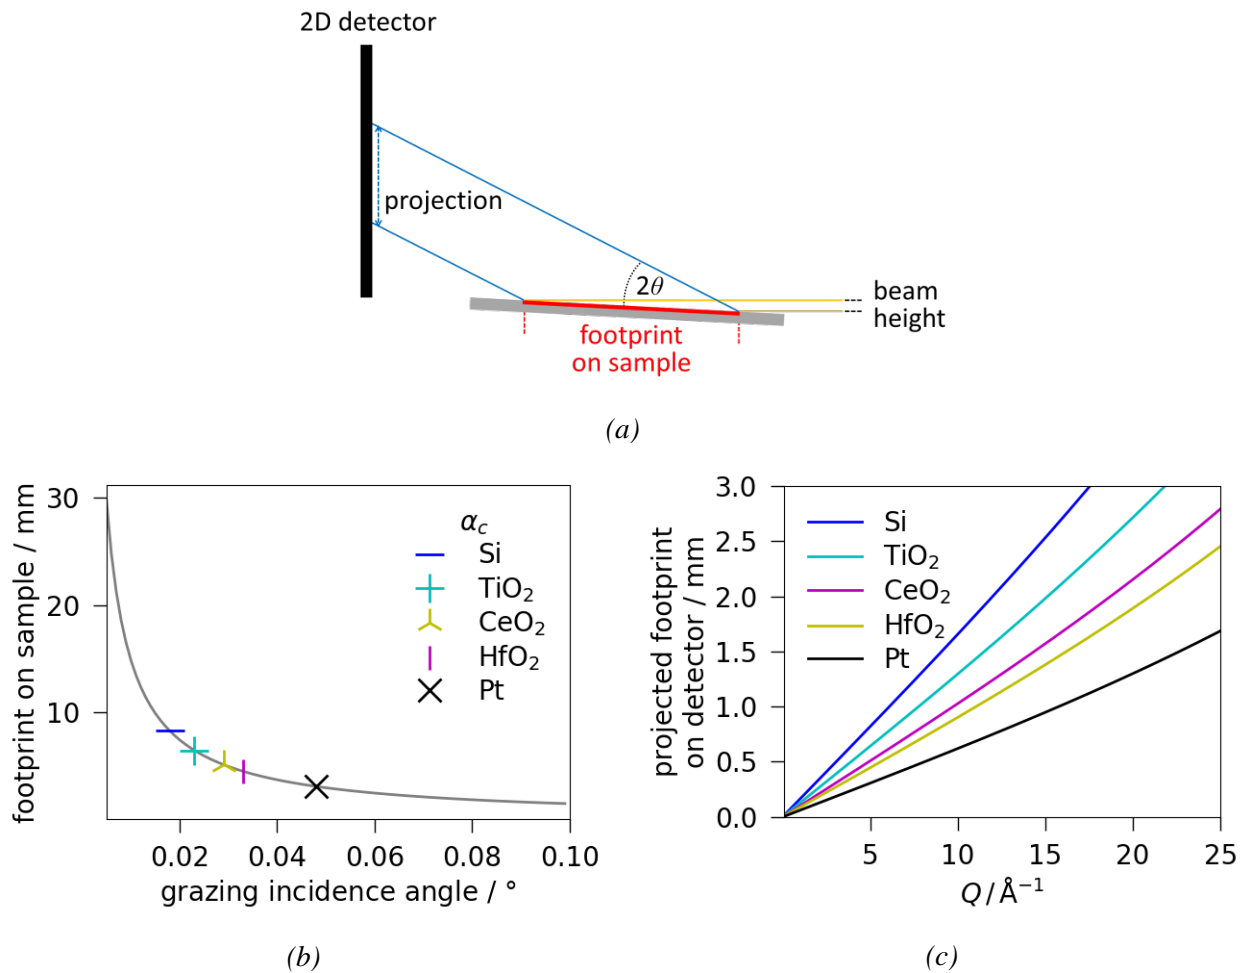

**Figure S3:** (a) Schematic illustration of the grazing incidence geometry (incidence angle exaggerated for clarity) and projection of the footprint on the area detector; (b) footprint in dependence on the incidence angle with marked critical angles for some selected materials; (c) projected footprint on the area detector calculated for the critical angles of the indicated materials; all values are calculated for a beam height of  $3\ \mu\text{m}$  based on simple trigonometric considerations for the vertical scattering plane and a photon energy of  $100\ \text{keV}$ .

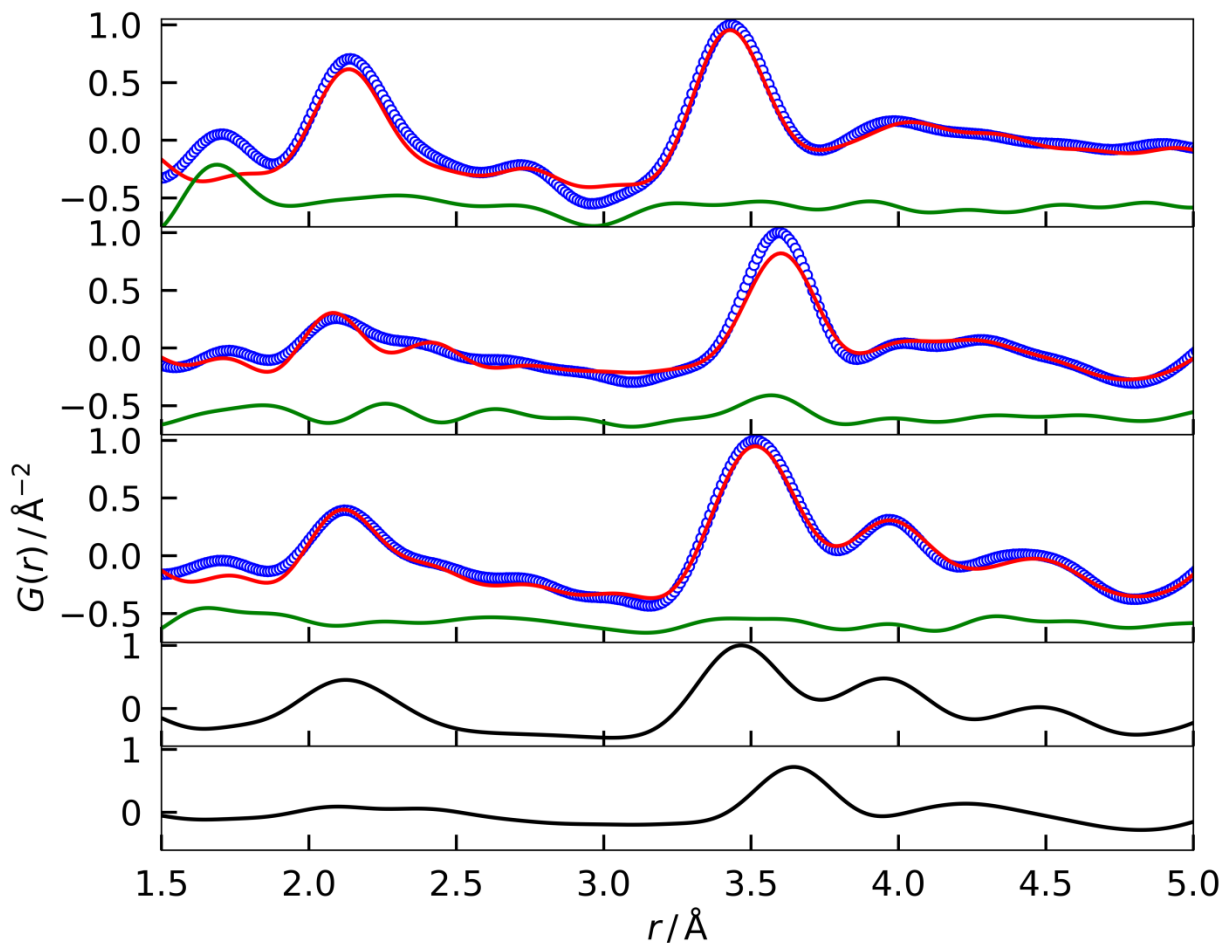

**Figure S4:** Zoom into Figure 4 of the main text to illustrate the local order of (from top to bottom) a spin-coated  $\text{ZrO}_2$  film pre-annealed at  $295\text{ }^\circ\text{C}$ , two crystalline  $\text{ZrO}_2$  films prepared from equally pre-annealed films and heated to  $800\text{ }^\circ\text{C}$  in a rapid thermal annealing process with a heating rate of  $\sim 100\text{ K min}^{-1}$ , and annealed at  $900\text{ }^\circ\text{C}$  in air at a slow heating rate of  $\sim 10\text{ K min}^{-1}$ , respectively (blue dots: data, red lines: calculated model, green line: difference curve, offset of  $-0.5$  for clarity), along with the calculated reference PDFs from the ICSD database (references #658755 for monoclinic and #93124 for tetragonal with reduced values for  $U_{\text{iso}}$  extrapolated to room temperature).

**Table S1:**  $Q_{\max}$  values applied in the Fourier transformation into the GIPDFs shown in the main text (with the exception of the calibration illustrated in Figure 3 where the  $Q_{\max}$  values are included as a plot).

| <b>figure (text passage)</b> | <b>material</b>    | <b>parameters</b>        | <b><math>Q_{\max} / \text{\AA}^{-1}</math></b> |
|------------------------------|--------------------|--------------------------|------------------------------------------------|
| Fig. 2 (Section 3.1)         | Pt                 | 3 nm thickness           | 17.2                                           |
|                              |                    | HfO <sub>2</sub>         | 15 nm, crystalline                             |
|                              | 30 nm, crystalline |                          | 21.1                                           |
|                              | 45 nm, crystalline |                          | 21.1                                           |
|                              | 15 nm, amorphous   |                          | 12.5                                           |
|                              | 30 nm, amorphous   |                          | 12.5                                           |
|                              | 45 nm, amorphous   | 14.4                     |                                                |
| Fig. 4 (Section 3.3)         | ZrO <sub>2</sub>   | 295 °C thermal treatment | 21.0                                           |
|                              |                    | 800 °C thermal treatment | 21.0                                           |
|                              |                    | 900 °C thermal treatment | 21.0                                           |
| Fig. 5 (Section 3.4)         | Pt                 | normal incidence         | 17.0                                           |
|                              |                    | grazing incidence        | 24.0                                           |
